# Supplementary material
Source: HighWire-hosted journal article supplement (doi:10.1101/rna.079669.123)
Supplement: Supplemental_Legends.docx [file Supplemental_Legends.docx]

**Supplemental Material**

**Figure Legends**

**Figure S1. The dTAG does not alter Trim71’s function in mESCs.**

A. Proliferation of mESCs. The cells were cultured in the 15%FBS+Lif medium, and the cell proliferation was monitored by the CellTiter 96 AQueous One Solution Cell Proliferation Assay (Promega). The results represent the means (± SD) of three independent experiments. n.s. not significant (p>0.05) by the Student’s t-test.

B. Colony formation assay for mouse embryonic stem cells (mESCs).

C. Exit pluripotency assay for mESCs.

In (B) and (C), the colony morphology and AP intensity were evaluated through microscopy. 100–200 colonies were examined each time to determine the percentage of undifferentiated colonies. The results represent the means (± SD) of four (B) or three (C) independent experiments. n.s. not significant (p>0.05) by the Student’s t-test.

**Figure S2. The increased Ago2 is not caused by potential decreased global protein degradation.**

A. Expression levels (in transcripts per million reads (TPM)) of Trim71, eRF1, Ddx3x in mESCs cultured in the 2i+Lif medium. The results are from two independent RNA-seq experiments.

B. Western blotting in the eRF1-dTAG mESCs at the indicated time points after dTAG-13 (500nM) treatment. Gapdh protein levels were used for normalization in protein quantification.

C. Western blotting in the Ddx3x-dTAG mESCs at the indicated time points after dTAG-13 (500nM) treatment. Beta-Tubulin protein levels were used for normalization in protein quantification.
